# Supplementary material
Source: publisher site journal article supplement (https://kjim.org/upload/media/kjim-2023-476-Supplementary-Table-4.pdf)
Supplement: Supplementary file 1 [file kjim-2023-476-Supplementary-Table-4.pdf]

**Supplementary Table 4. Chi-square test for the number of comorbidities**

| Lifestyle factor           | No. of comorbidities |            | $\chi^2$ (p) |
|----------------------------|----------------------|------------|--------------|
|                            | 0-2                  | $\geq 3$   |              |
| Vegetable consumption      |                      |            |              |
| < 5 times/wk (n = 132)     | 114 (86.36)          | 18 (13.64) | 2.95 (0.09)  |
| $\geq 5$ times/wk (n = 99) | 76 (76.77)           | 23 (23.23) |              |
| Exercise                   |                      |            |              |
| < 3 times/wk (n = 166)     | 140 (84.34)          | 26 (15.66) | 1.36 (0.24)  |
| $\geq 3$ times/wk (n = 65) | 50 (76.92)           | 15 (23.08) |              |

Values are presented as number (%).
